# Supplementary material for: Radical Intermediates in Photoinduced Reactions on TiO2 (An EPR Spin Trapping Study)
Source: PubMed Central journal article supplement (PMC6271711; doi:10.3390/molecules191117279), 2014-10-28

## Supplementary Materials

**Figure S1.** Experimental EPR spectrum ( $SW = 8$  mT) obtained after argon saturation of methanol  $\text{TiO}_2$  P25 suspension ( $0.167 \text{ mg}\cdot\text{mL}^{-1}$ ) irradiated under air in the presence of DMPO spin trap ( $c_{0,\text{DMPO}} = 0.035 \text{ M}$ ), along with the simulated spectrum constructed from the EPR signals of the individual spin-adducts. The spin Hamiltonian parameters of spin-adducts are summarized in Table 4.

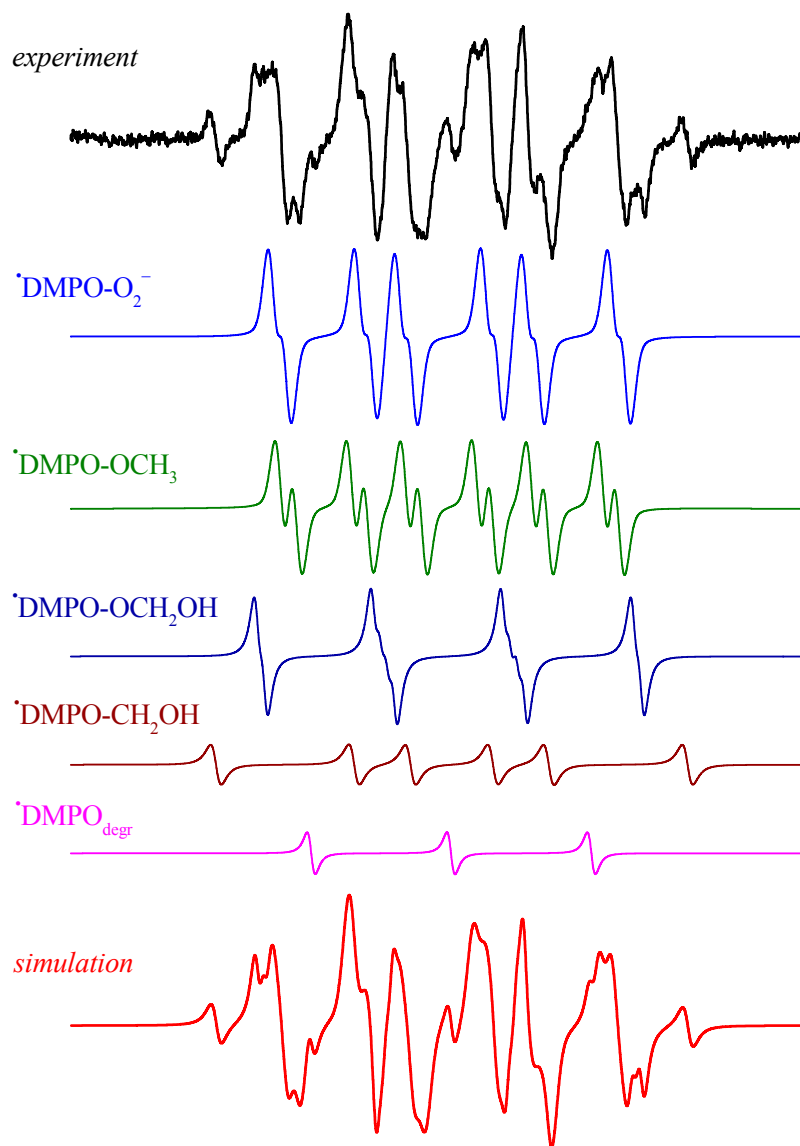

**Figure S2.** Experimental EPR spectrum ( $SW = 8$  mT) obtained after argon saturation of ethanol  $\text{TiO}_2$  P25 suspension ( $0.167 \text{ mg}\cdot\text{mL}^{-1}$ ) irradiated under air in the presence of DMPO spin trap ( $c_{0,\text{DMPO}} = 0.035 \text{ M}$ ), along with the simulated spectrum constructed from the EPR signals of the individual spin-adducts. The spin Hamiltonian parameters of spin-adducts are summarized in Table 4.

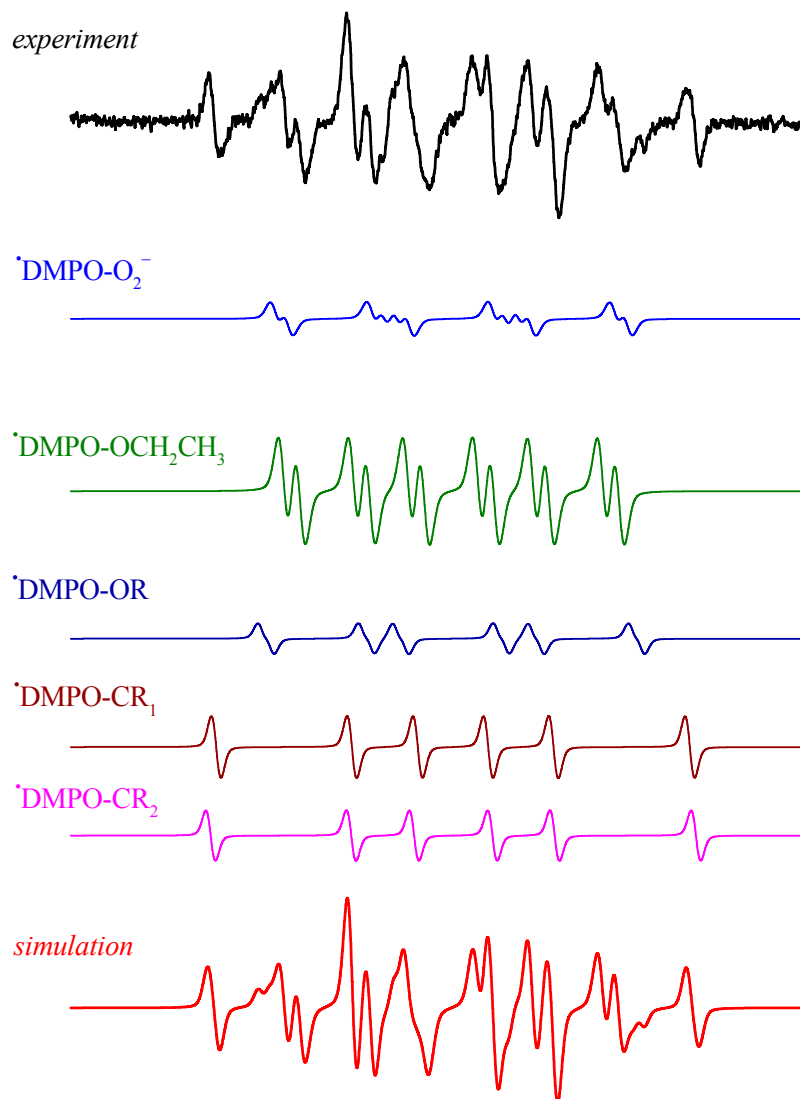

Supplement: molecules-19-17279-s001.pdf [file molecules-19-17279-s001.pdf]
